# Supplementary material for: Three 3D lanthanide–organic frameworks with sra topology: syntheses, structures, luminescence and magnetic properties
Source: Royal Society of Chemistry journal article supplement (doi:10.1039/c3ce42553c), 2014-01-01
Supplement: c3ce42553c1.pdf [file c3ce42553c1.pdf]

## Electronic Supplementary Information (ESI)

### Three 3D Lanthanide-Organic Frameworks with sra Topology: Syntheses, Structures, Luminescence and Magnetic Properties

Xiaolan Liu,<sup>a</sup> Xin Wang,<sup>a</sup> Ting Gao,<sup>a</sup> Yan Xu,<sup>a</sup> Xuan Shen,<sup>a</sup> Dunru Zhu<sup>\*,a,b</sup>

<sup>a</sup>State Key Laboratory of Materials-oriented Chemical Engineering, College of Chemistry and  
Chemical Engineering, Nanjing Tech University, Nanjing 210009, P. R. China, <sup>b</sup>State Key  
Laboratory of Coordination Chemistry, Nanjing University, Nanjing 210093, P. R. China

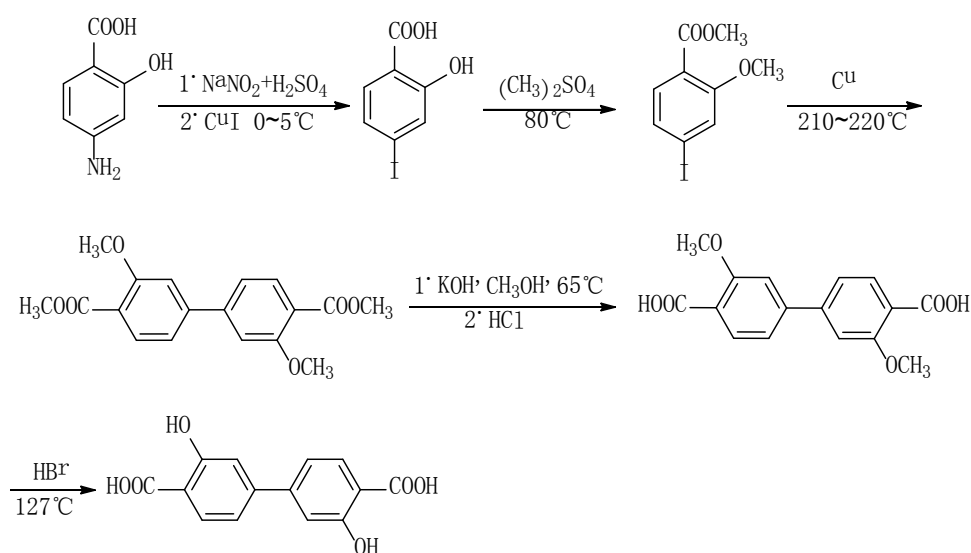

**Scheme S1** Synthesis of 3,3'-dihydroxy-4,4'-biphenyldicarboxylic acid (H<sub>4</sub>L)

**Table S1** Selected bond lengths (Å) for LOFs 1–3

| 1                      |          |                       |          |
|------------------------|----------|-----------------------|----------|
| Eu1–O1                 | 2.764(5) | Eu1–O2                | 2.416(5) |
| Eu1–O7                 | 2.372(6) | Eu1–O3 <sup>i</sup>   | 2.387(5) |
| Eu1–O1 <sup>ii</sup>   | 2.384(5) | Eu1–O2 <sup>iii</sup> | 2.359(5) |
| Eu1–O5 <sup>iii</sup>  | 2.215(5) | Eu1–O4 <sup>iv</sup>  | 2.397(5) |
| Eu1⋯Eu1 <sup>iii</sup> | 3.914(5) | Eu1⋯Eu1 <sup>ii</sup> | 4.142(5) |
| 2                      |          |                       |          |
| Gd1–O1                 | 2.773(6) | Gd1–O2                | 2.424(5) |
| Gd1–O7                 | 2.348(7) | Gd1–O3 <sup>i</sup>   | 2.363(6) |
| Gd1–O1 <sup>ii</sup>   | 2.371(6) | Gd1–O2 <sup>iii</sup> | 2.343(6) |
| Gd1–O5 <sup>iii</sup>  | 2.216(6) | Gd1–O4 <sup>iv</sup>  | 2.385(6) |
| Gd1⋯Gd1 <sup>iii</sup> | 3.891(6) | Gd1⋯Gd1 <sup>ii</sup> | 4.136(6) |
| 3                      |          |                       |          |
| Dy1–O1                 | 2.716(6) | Dy1–O2                | 2.371(6) |
| Dy1–O7                 | 2.336(7) | Dy1–O3 <sup>i</sup>   | 2.343(7) |
| Dy1–O1 <sup>ii</sup>   | 2.344(6) | Dy1–O2 <sup>iii</sup> | 2.326(6) |
| Dy1–O5 <sup>iii</sup>  | 2.190(6) | Dy1–O4 <sup>iv</sup>  | 2.357(6) |
| Dy1⋯Dy1 <sup>iii</sup> | 3.830(6) | Dy1⋯Dy1 <sup>ii</sup> | 4.061(6) |

Symmetry codes: (i) 3–x, y+1/2, –z–1/2; (ii) 2–x, –y, –z; (iii) 3–x, –y, –z; (iv) x, –y–1/2, z+1/2.

**Table S2** Selected bond angles (°) for LOFs 1–3

| 1                                       |            |                                          |            |                                         |            |
|-----------------------------------------|------------|------------------------------------------|------------|-----------------------------------------|------------|
| O1–Eu1–O2                               | 49.09(16)  | O1–Eu1–O7                                | 87.60(2)   | O1–Eu1–O3 <sup>i</sup>                  | 75.86(18)  |
| O1–Eu1–O1 <sup>ii</sup>                 | 73.09(18)  | O1–Eu1–O2 <sup>iii</sup>                 | 117.28(16) | O1–Eu1–O5 <sup>iii</sup>                | 171.27(17) |
| O1–Eu1–O4 <sup>iv</sup>                 | 95.52(18)  | O2–Eu1–O7                                | 132.10(2)  | O2–Eu1–O3 <sup>i</sup>                  | 73.35(19)  |
| O1 <sup>ii</sup> –Eu1–O2                | 104.32(17) | O2–Eu1–O2 <sup>iii</sup>                 | 69.90(2)   | O2–Eu1–O5 <sup>iii</sup>                | 138.88(19) |
| O2–Eu1–O4 <sup>iv</sup>                 | 71.12(19)  | O3 <sup>i</sup> –Eu1–O7                  | 77.20(2)   | O1 <sup>ii</sup> –Eu1–O7                | 75.20(2)   |
| O2 <sup>iii</sup> –Eu1–O7               | 135.10(2)  | O5 <sup>iii</sup> –Eu1–O7                | 86.20(2)   | O4 <sup>iv</sup> –Eu1–O7                | 143.40(2)  |
| O1 <sup>ii</sup> –Eu1–O3 <sup>i</sup>   | 138.88(18) | O2 <sup>iii</sup> –Eu1–O3 <sup>i</sup>   | 74.17(19)  | O3 <sup>i</sup> –Eu1–O5 <sup>iii</sup>  | 108.7(2)   |
| O3 <sup>i</sup> –Eu1–O4 <sup>iv</sup>   | 138.88(19) | O1 <sup>ii</sup> –Eu1–O2 <sup>iii</sup>  | 145.05(19) | O1 <sup>ii</sup> –Eu1–O5 <sup>iii</sup> | 99.33(19)  |
| O1 <sup>ii</sup> –Eu1–O4 <sup>iv</sup>  | 70.98(19)  | O2 <sup>iii</sup> –Eu1–O5 <sup>iii</sup> | 71.41(18)  | O2 <sup>iii</sup> –Eu1–O4 <sup>iv</sup> | 74.71(18)  |
| O4 <sup>iv</sup> –Eu1–O5 <sup>iii</sup> | 85.80(2)   | Eu1–O1–Eu1 <sup>ii</sup>                 | 106.90(2)  | Eu1–O2–Eu1 <sup>iii</sup>               | 110.09(2)  |
| 2                                       |            |                                          |            |                                         |            |
| O1–Gd1–O2                               | 49.03(18)  | O1–Gd1–O7                                | 88.00(2)   | O1–Gd1–O3 <sup>i</sup>                  | 76.24(19)  |
| O1–Gd1–O1 <sup>ii</sup>                 | 73.20(2)   | O1–Gd1–O2 <sup>iii</sup>                 | 117.78(18) | O1–Gd1–O5 <sup>iii</sup>                | 170.35(19) |
| O1–Gd1–O4 <sup>iv</sup>                 | 96.30(2)   | O2–Gd1–O7                                | 132.70(2)  | O2–Gd1–O3 <sup>i</sup>                  | 74.10(2)   |
| O1 <sup>ii</sup> –Gd1–O2                | 104.30(2)  | O2–Gd1–O2 <sup>iii</sup>                 | 70.60(2)   | O2–Gd1–O5 <sup>iii</sup>                | 139.60(2)  |
| O2–Gd1–O4 <sup>iv</sup>                 | 71.60(2)   | O3 <sup>i</sup> –Gd1–O7                  | 77.60(2)   | O1 <sup>ii</sup> –Gd1–O7                | 74.50(2)   |
| O2 <sup>iii</sup> –Gd1–O7               | 134.90(2)  | O5 <sup>iii</sup> –Gd1–O7                | 85.40(2)   | O4 <sup>iv</sup> –Gd1–O7                | 142.50(2)  |
| O1 <sup>ii</sup> –Gd1–O3 <sup>i</sup>   | 138.90(2)  | O2 <sup>iii</sup> –Gd1–O3 <sup>i</sup>   | 74.20(2)   | O3 <sup>i</sup> –Gd1–O5 <sup>iii</sup>  | 109.00(2)  |
| O3 <sup>i</sup> –Gd1–O4 <sup>iv</sup>   | 139.60(2)  | O1 <sup>ii</sup> –Gd1–O2 <sup>iii</sup>  | 145.40(2)  | O1 <sup>ii</sup> –Gd1–O5 <sup>iii</sup> | 98.20(2)   |

|                                         |           |                                          |           |                                         |           |
|-----------------------------------------|-----------|------------------------------------------|-----------|-----------------------------------------|-----------|
| O1 <sup>ii</sup> -Gd1-O4 <sup>iv</sup>  | 71.30(2)  | O2 <sup>iii</sup> -Gd1-O5 <sup>iii</sup> | 71.80(2)  | O2 <sup>iii</sup> -Gd1-O4 <sup>iv</sup> | 74.80(2)  |
| O4 <sup>iv</sup> -Gd1-O5 <sup>iii</sup> | 84.90(2)  | Gd1-O1-Gd1 <sup>ii</sup>                 | 106.81(2) | Gd1-O2-Gd1 <sup>iii</sup>               | 109.39(2) |
| <b>3</b>                                |           |                                          |           |                                         |           |
| O1-Dy1-O2                               | 50.06(19) | O1-Dy1-O7                                | 86.40(2)  | O1-Dy1-O3 <sup>i</sup>                  | 74.60(2)  |
| O1-Dy1-O1 <sup>ii</sup>                 | 73.50(2)  | O1-Dy1-O2 <sup>iii</sup>                 | 118.00(2) | O1-Dy1-O5 <sup>iii</sup>                | 169.00(2) |
| O1-Dy1-O4 <sup>iv</sup>                 | 98.80(2)  | O2-Dy1-O7                                | 133.00(2) | O2-Dy1-O3 <sup>i</sup>                  | 75.20(2)  |
| O1 <sup>ii</sup> -Dy1-O2                | 102.90(2) | O2-Dy1-O2 <sup>iii</sup>                 | 70.70(2)  | O2-Dy1-O5 <sup>iii</sup>                | 140.30(2) |
| O2-Dy1-O4 <sup>iv</sup>                 | 71.60(2)  | O3 <sup>i</sup> -Dy1-O7                  | 76.80(2)  | O1 <sup>ii</sup> -Dy1-O7                | 75.40(2)  |
| O2 <sup>iii</sup> -Dy1-O7               | 134.50(2) | O5 <sup>iii</sup> -Dy1-O7                | 84.80(3)  | O4 <sup>iv</sup> -Dy1-O7                | 142.40(2) |
| O1 <sup>ii</sup> -Dy1-O3 <sup>i</sup>   | 138.50(2) | O2 <sup>iii</sup> -Dy1-O3 <sup>i</sup>   | 74.30(2)  | O3 <sup>i</sup> -Dy1-O5 <sup>iii</sup>  | 109.50(2) |
| O3 <sup>i</sup> -Dy1-O4 <sup>iv</sup>   | 140.50(2) | O1 <sup>ii</sup> -Dy1-O2 <sup>iii</sup>  | 145.30(2) | O1 <sup>ii</sup> -Dy1-O5 <sup>iii</sup> | 98.00(2)  |
| O1 <sup>ii</sup> -Dy1-O4 <sup>iv</sup>  | 70.60(2)  | O2 <sup>iii</sup> -Dy1-O5 <sup>iii</sup> | 72.90(2)  | O2 <sup>iii</sup> -Dy1-O4 <sup>iv</sup> | 75.10(2)  |
| O4 <sup>iv</sup> -Dy1-O5 <sup>iii</sup> | 84.40(3)  | Dy1-O1-Dy1 <sup>ii</sup>                 | 106.56(2) | Dy1-O2-Dy1 <sup>iii</sup>               | 109.29(2) |

Symmetry codes: (i)  $3-x, y+1/2, -z-1/2$ ; (ii)  $2-x, -y, -z$ ; (iii)  $3-x, -y, -z$ ; (iv)  $x, -y-1/2, z+1/2$ .

**Table S3** Hydrogen-bonding geometry (Å, °) for LOF 2

| D-H...A                    | d(D-H) | d(H...A) | d(D...A) | ∠D-H...A |
|----------------------------|--------|----------|----------|----------|
| O6-H6B...O4                | 0.82   | 1.90     | 2.609(6) | 144      |
| O6-H6B...O1 <sup>v</sup>   | 0.82   | 2.60     | 3.276(6) | 141      |
| C15-H15A...O3 <sup>i</sup> | 0.93   | 2.52     | 3.093(6) | 120      |
| C17-H17A...O7              | 0.96   | 2.38     | 2.785(6) | 105      |
| C19-H19A...O9              | 0.96   | 1.98     | 2.433(6) | 107      |
| C21-H21A...O8              | 0.96   | 1.90     | 2.398(6) | 109      |

Symmetry codes: (i)  $3-x, y+1/2, -z-1/2$ ; (v)  $2-x, y-1/2, -z-1/2$

**Table S4** The dihedral angles for ligand (HL)<sup>3-</sup> in LOFs 1-3

| LOFs     | Two OH groups               | SBU              | Dihedral angles (°) |                                        |
|----------|-----------------------------|------------------|---------------------|----------------------------------------|
|          |                             |                  | Ph/Ph ring          | CO <sub>2</sub> <sup>2-</sup> /Ph ring |
| <b>1</b> | One free;<br>one coordinate | EuO <sub>8</sub> | 36.6(1)             | 16.4(1); 1.7(1)                        |
| <b>2</b> | One free;<br>one coordinate | GdO <sub>8</sub> | 37.3(1)             | 17.0(1); 2.1(1)                        |
| <b>3</b> | One free;<br>one coordinate | DyO <sub>8</sub> | 39.1(1)             | 17.7(1); 2.6(1)                        |

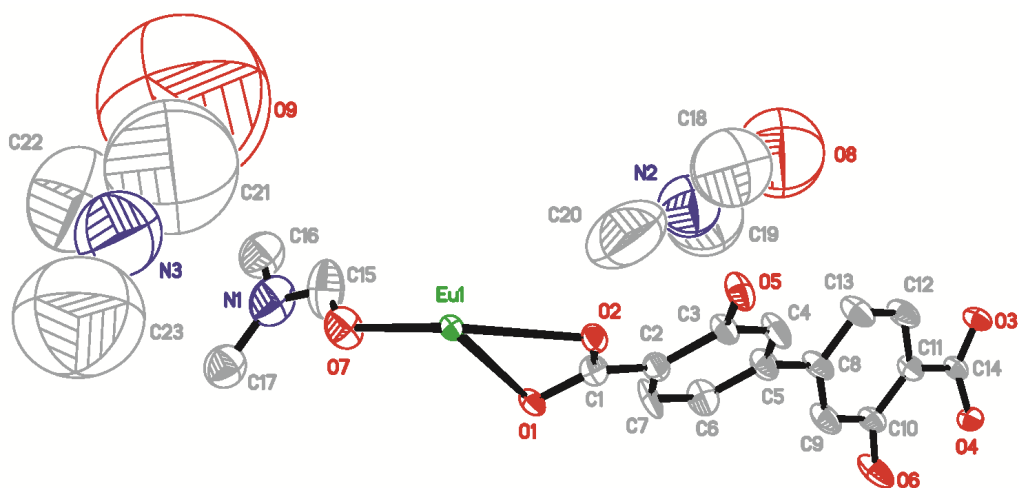

**Fig. S1** ORTEP drawing (at 50% probability) of the asymmetric unit for LOF 1 (Hydrogen atoms are omitted for clarity).

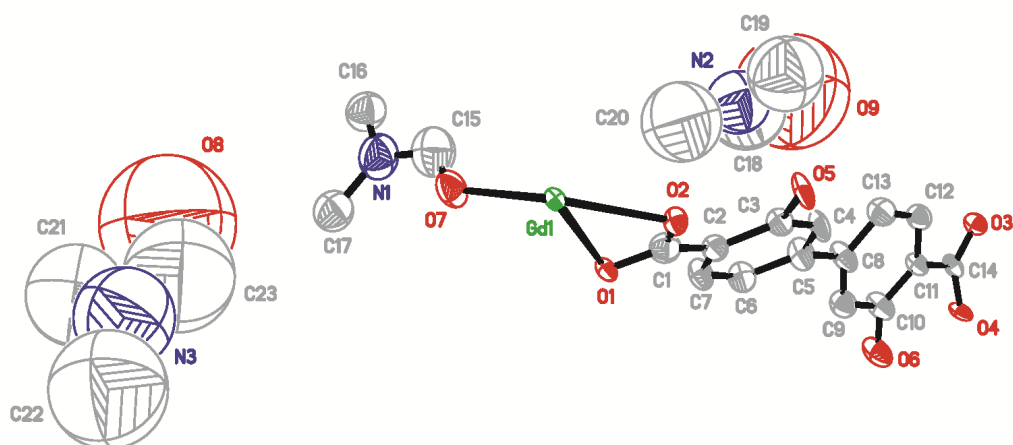

**Fig. S2** ORTEP drawing (at 50% probability) of the asymmetric unit for LOF 2 (Hydrogen atoms are omitted for clarity).

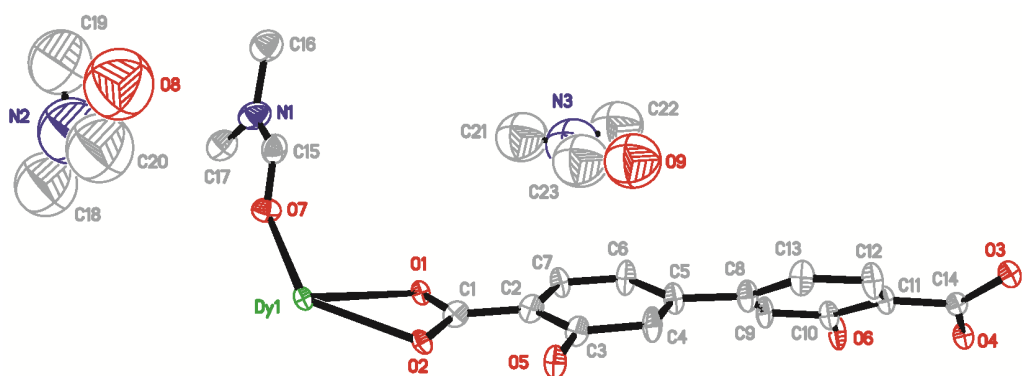

**Fig. S3** ORTEP drawing (at 50% probability) of the asymmetric unit for LOF 3 (Hydrogen atoms are omitted for clarity).

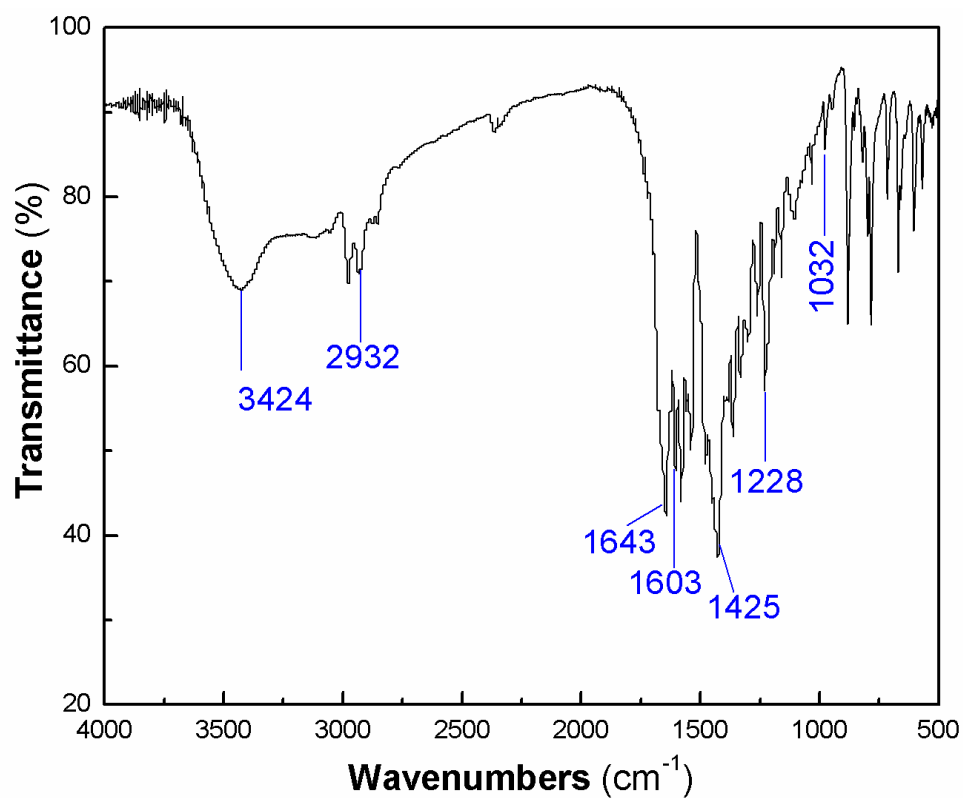

Fig. S4 The IR spectra of LOF 1.

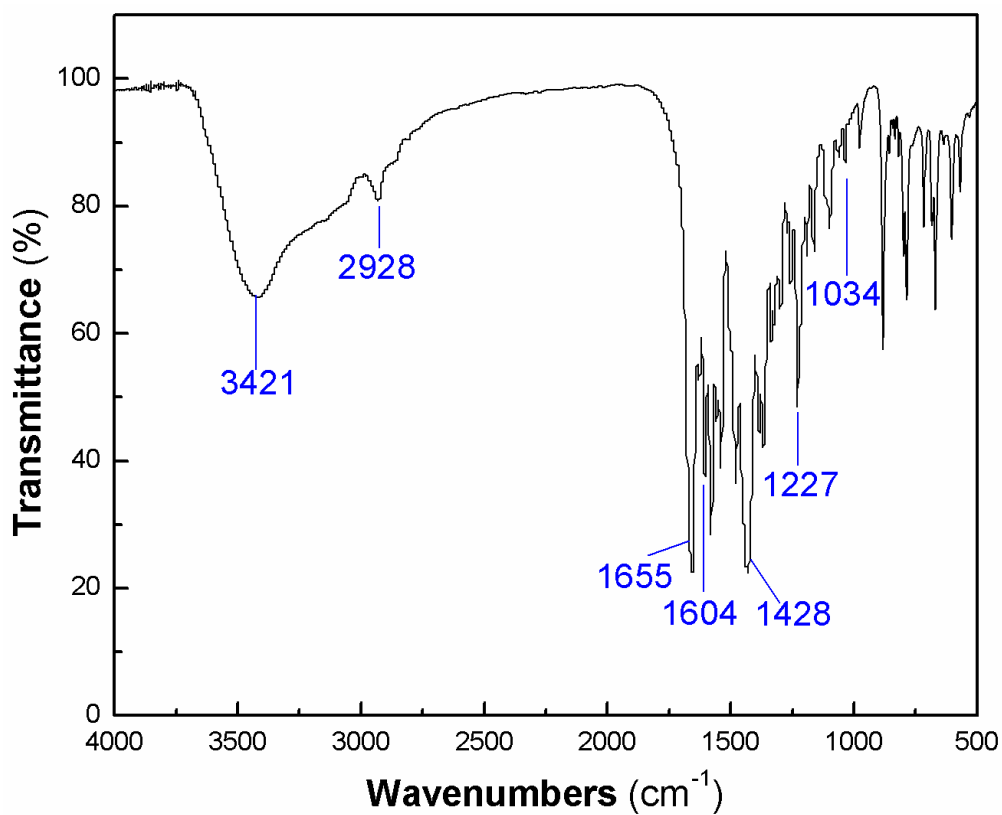

Fig. S5 The IR spectra of LOF 2.

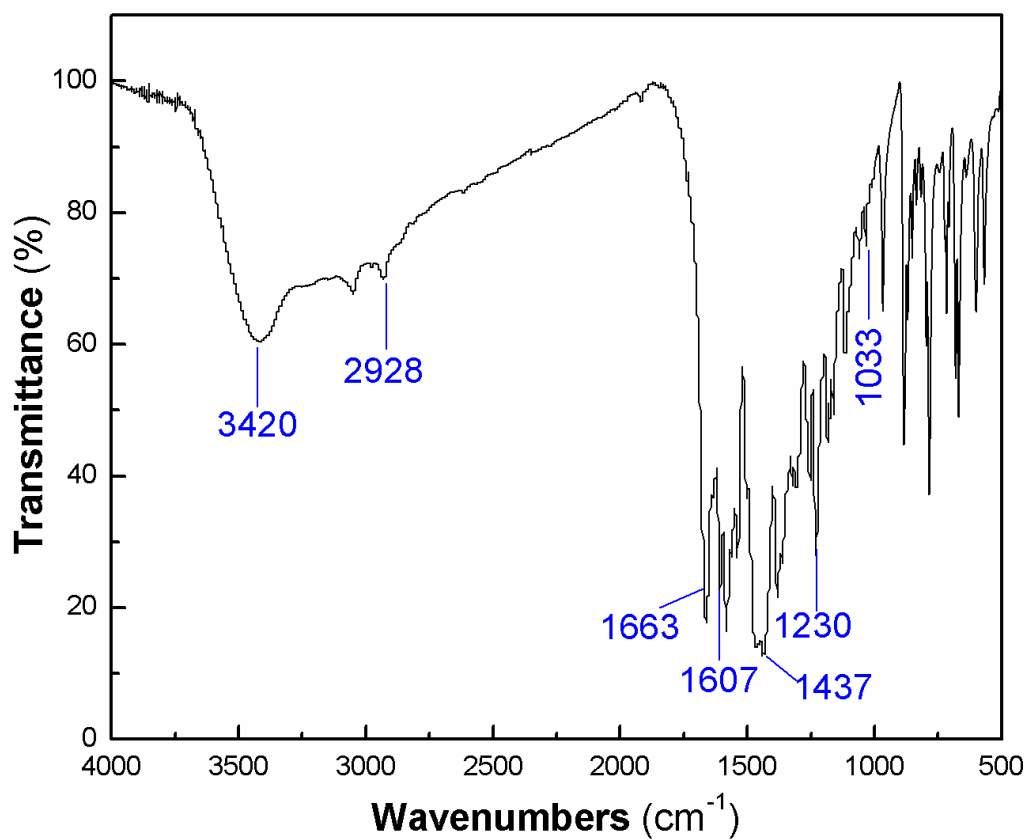

Fig. S6 The IR spectra of LOF 3.

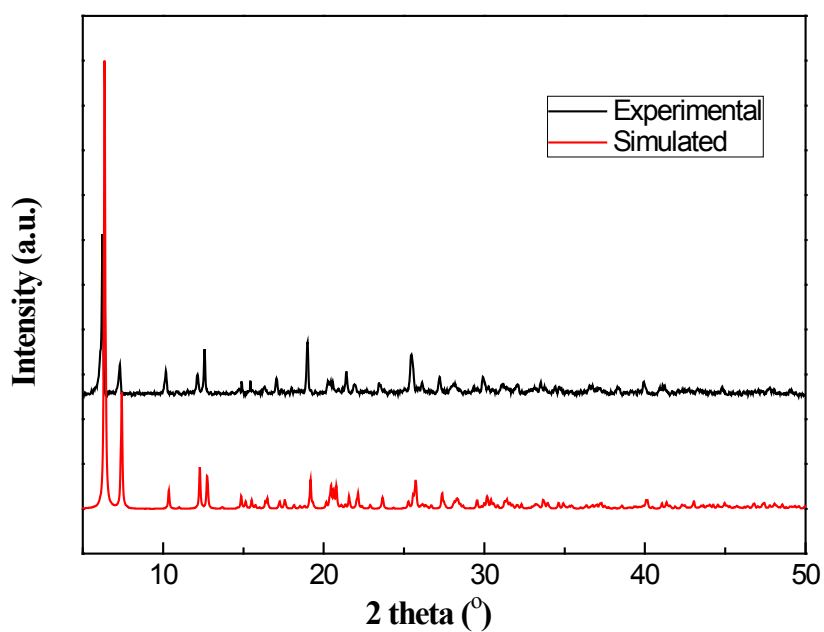

Fig. S7 Experimental and simulated powder X-ray diffraction patterns of LOF 1.

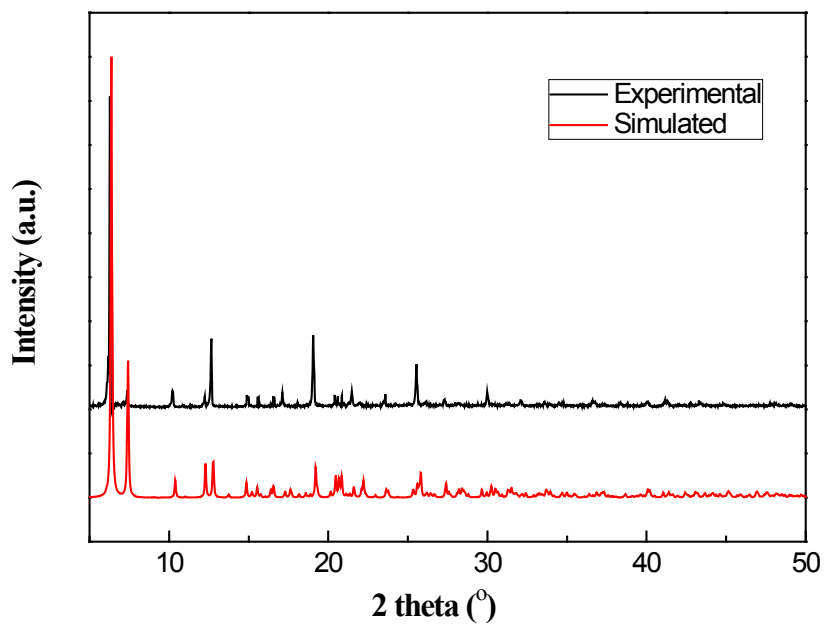

**Fig. S8** Experimental and simulated powder X-ray diffraction patterns of LOF 2.

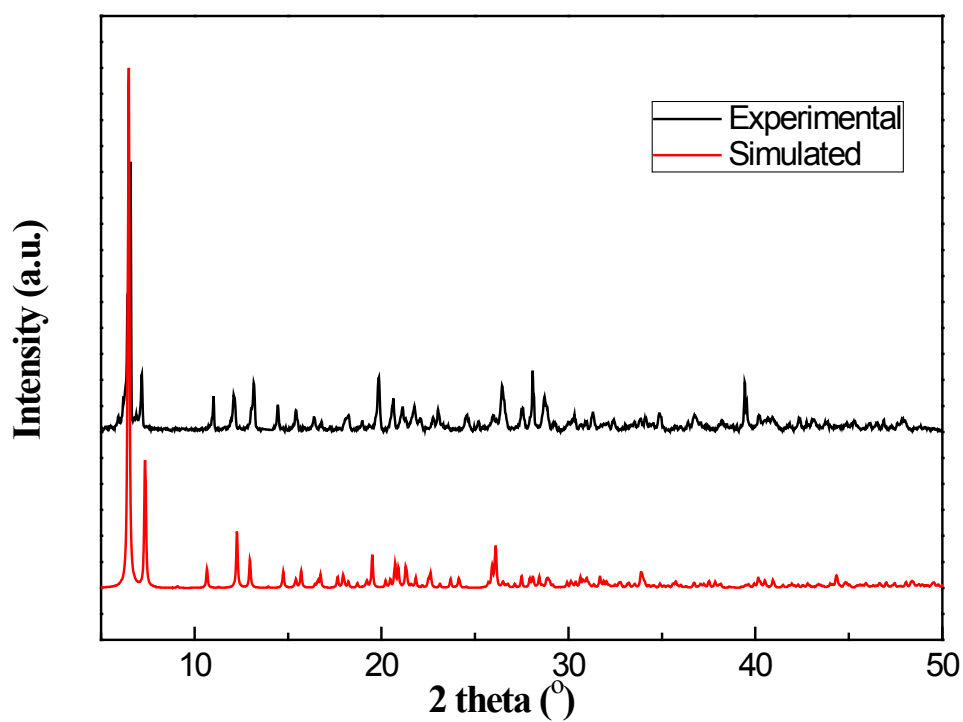

**Fig. S9** Experimental and simulated powder X-ray diffraction patterns of LOF 3.

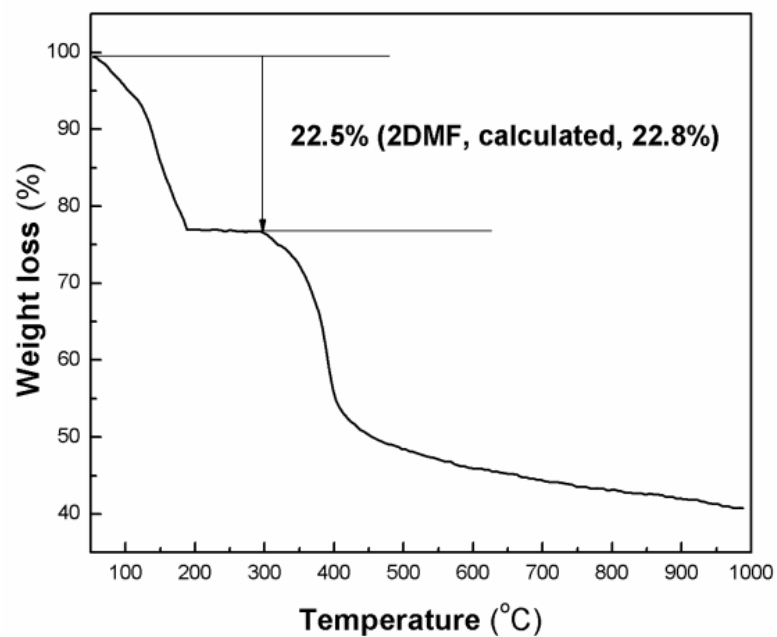

**Fig. S10** TGA curve for LOF 1.

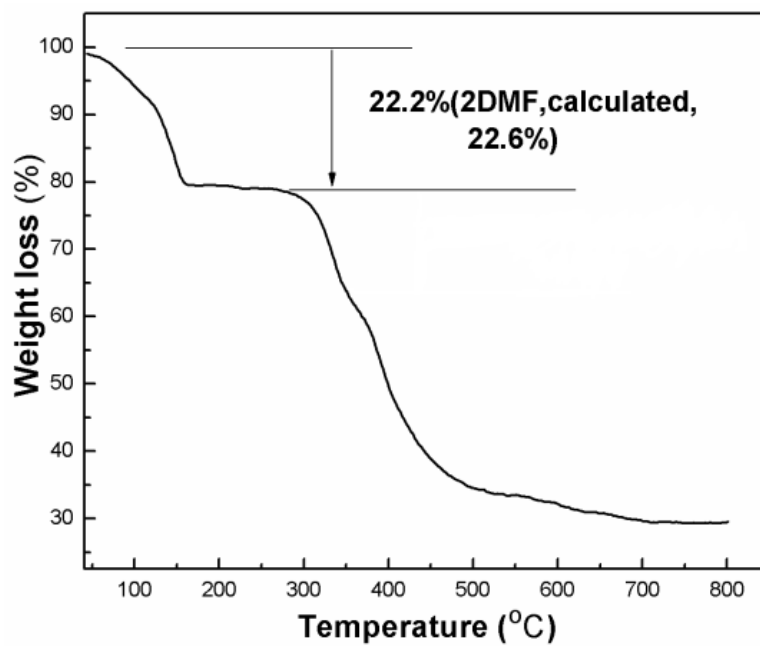

**Fig. S11** TGA curve for LOF 2.



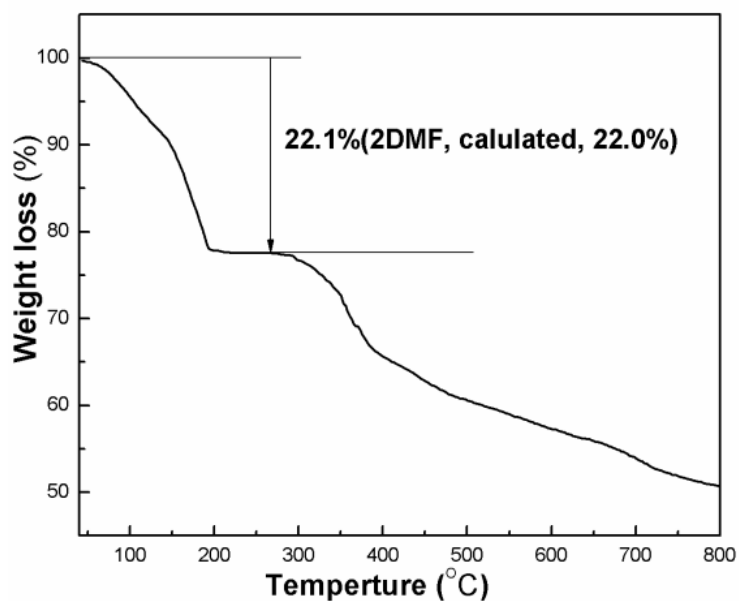

**Fig. S12** TGA curve for LOF 3.

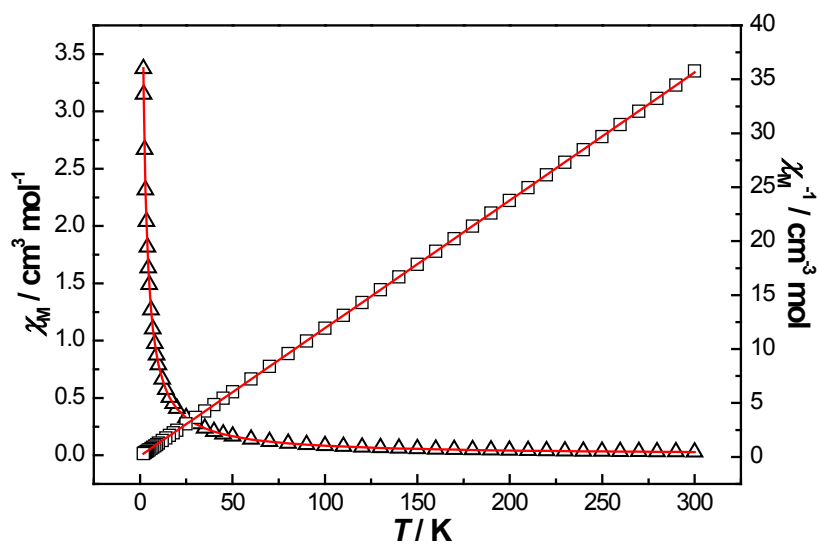

**Fig. S13** Variable-temperature susceptibilities for **2** in the form of  $\chi_M$  and  $\chi_M^{-1}$  vs.  $T$  under a field of 100 Oe. The solid red lines were derived from the fitting by the Curie-Weiss law.

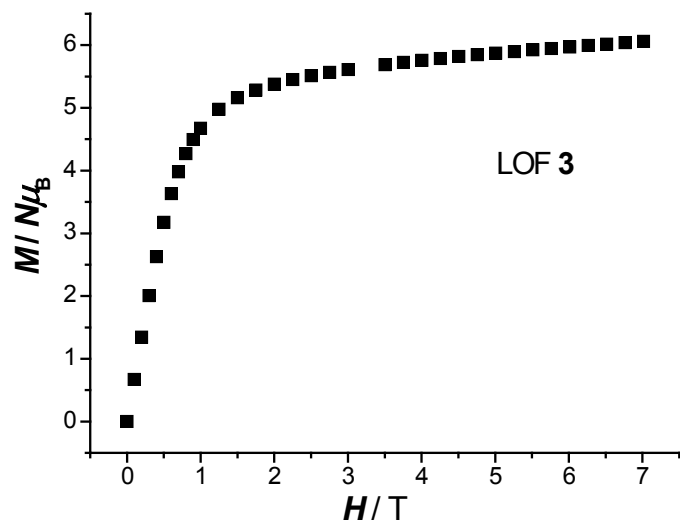

Fig. S14 M-H plot for **3** at 1.8 K.

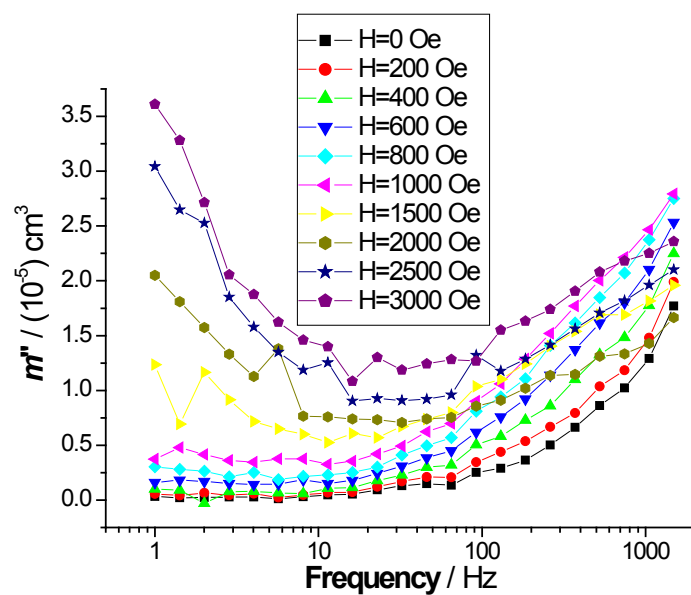

Fig. S15 Frequency dependence of the imaginary  $\chi''$  components of the AC susceptibilities measured in different DC applied field for **3** in 1.8 K.
